# Supplementary material for: In situ detection of heavy metal ions in sewage with screen-printed electrode-based portable electrochemical sensors
Source: Royal Society of Chemistry journal article supplement (doi:10.1039/d1an01012c), 2021-01-01
Supplement: d1an01012c1.pdf [file d1an01012c1.pdf]

## Supporting information

# In situ detection of heavy-metal ions in sewage with screen-printed electrode-based portable electrochemical sensor

Qiwen Bao<sup>1</sup>, Gang Li<sup>1</sup>, Zhengchun Yang<sup>2</sup>, Peng Pan<sup>2</sup>, Jun Liu<sup>2</sup>, Ruirui Li<sup>2</sup>, Jun Wei<sup>3</sup>, Wei Hu<sup>4</sup>, Wenbo Cheng<sup>4</sup> and Ling Lin<sup>1\*</sup>

<sup>1</sup> School of Precision Instrument and Optoelectronic Engineering, the State Key Laboratory of Precision Measuring Technology and Instruments, 92 Weijin Road, Tianjin University, Tianjin 300072, China

<sup>2</sup> School of Electrical and Electronic Engineering, Tianjin Key Laboratory of Film Electronic & Communication Devices, Advanced Materials and Printed Electronics Center, Tianjin University of Technology, Tianjin 300384, China

<sup>3</sup> School of Materials Science and Engineering, Harbin Institute of Technology, Shenzhen 518055, China

<sup>4</sup> Tianjin Guokeyigong Science and Technology Development Co., Ltd., Tianjin 300399, China

\* Corresponding author (email: linling@tju.edu.cn)

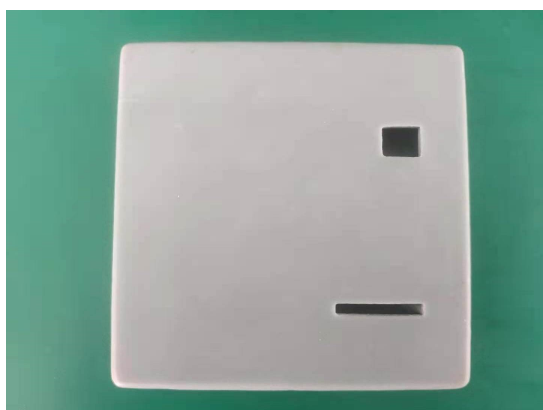

**Fig S1** The picture of the finished product.

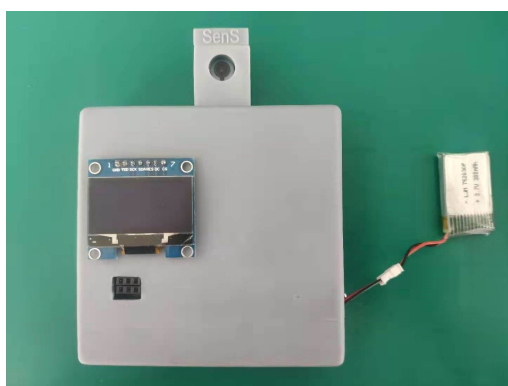

**Fig S2** The miniature workstation.
